# Supplementary material
Source: ML conference proceedings conference paper supplement (https://openaccess.thecvf.com/content/CVPR_2020/html/Niklaus_Softmax_Splatting_for_CVPR_2020_paper.html)
Supplement: Supplementary file 1 [file Niklaus_Softmax_Splatting_for_CVPR_2020_supplemental.zip]

# Softmax Splatting for Video Frame Interpolation

## — Supplementary Material —

Simon Niklaus  
Portland State University  
sniklaus@pdx.edu

Feng Liu  
Portland State University  
fliu@cs.pdx.edu

Please note that the section numbering within this supplementary document has manually been adjusted to match the relevant sections in the main paper.

### 3.1. Forward Warping via Softmax Splatting

Our proposed softmax splatting shares resemblance to the softmax function and is hence invariant to translations  $\beta$  with respect to  $Z$  which can easily be shown as follows.

$$\text{let } \mathbf{u} = \mathbf{p} - (\mathbf{q} + F_{0 \rightarrow t}[\mathbf{q}]) \quad (1)$$

$$b(\mathbf{u}) = \max(0, 1 - |\mathbf{u}_x|) \cdot \max(0, 1 - |\mathbf{u}_y|) \quad (2)$$

$$I_t^\sigma[\mathbf{p}] = \frac{\sum_{\forall \mathbf{q} \in I_0} \exp(Z[\mathbf{q}] + \beta) \cdot b(\mathbf{u}) \cdot I_0[\mathbf{q}]}{\sum_{\forall \mathbf{q} \in I_0} \exp(Z[\mathbf{q}] + \beta) \cdot b(\mathbf{u})} \quad (3)$$

$$= \frac{\sum_{\forall \mathbf{q} \in I_0} \exp(Z[\mathbf{q}]) \cdot \exp(\beta) \cdot b(\mathbf{u}) \cdot I_0[\mathbf{q}]}{\sum_{\forall \mathbf{q} \in I_0} \exp(Z[\mathbf{q}]) \cdot \exp(\beta) \cdot b(\mathbf{u})} \quad (4)$$

$$= \frac{\sum_{\forall \mathbf{q} \in I_0} \exp(Z[\mathbf{q}]) \cdot b(\mathbf{u}) \cdot I_0[\mathbf{q}]}{\sum_{\forall \mathbf{q} \in I_0} \exp(Z[\mathbf{q}]) \cdot b(\mathbf{u})} \quad (5)$$

This property is particularly important when mapping multiple pixels to the same location. For example, if  $Z$  represents depth then moving then changing  $Z' = Z + \beta$  should not affect the way the mapping ambiguity is resolved.

### 4.3. Quantitative Evaluation

As shown in Table 1 as well as Table 2 and summarized in Table 3, our proposed approach ranks first in the relevant Middlebury benchmark for optical flow [1]. Specifically, our approach achieves an average rank of 2.5 in terms of the interpolation error, compared to 5.4 achieved by the second highest ranked method. Similarly, in terms of the

normalized interpolation error, the average rank of our approach and the second highest ranked method are 2.0 and 10.8, respectively. Note that the second-best method differs, the second best method in terms of the interpolation error has not yet been published while DAIN [2] is the second best method in terms of the normalized interpolation error. These results demonstrate that our images synthesis approach, empowered by softmax platting, is able to consistently produce high-quality interpolation results.

Since common datasets to evaluate frame interpolation are subject to a relatively low resolution, we additionally incorporated 4K video clips from Xiph. These video clips are commonly used to assess video compression and contain challenging scenarios, such as significant bokeh that mixes foreground and background regions or fine-details that are reflective and subject to sudden brightness changes. For the purpose of evaluating frame interpolation techniques, we selected the eight 4K video clips with the most amount of inter-frame motion. Please see our main paper for more details where we state the average metrics. For completeness, we show the per-clip metrics in Tables 4–6.

### 4.4. Qualitative Evaluation

Since videos are at the heart of our approach, we provide a qualitative comparison in the supplementary video. We additionally provide still results on challenging examples from DAVIS [7] in Figures 1–3. These support the findings of the quantitative evaluation and show difficult scenarios where our proposed approach produces high-quality results whereas competing techniques are subject to visual artifacts. Please note that for methods with models trained using different losses, we only show the results for the models that focus on perceptual quality.

| Average<br>interpolation<br>error | avg.<br>rank | Mequon<br>(Hidden texture) |      |        | Schefflera<br>(Hidden texture) |      |        | Urban<br>(Synthetic) |      |        | Teddy<br>(Stereo) |      |        | Backyard<br>(High-speed camera) |      |        | Basketball<br>(High-speed camera) |      |        | Dumptruck<br>(High-speed camera) |      |        | Evergreen<br>(High-speed camera) |      |        |      |      |
|-----------------------------------|--------------|----------------------------|------|--------|--------------------------------|------|--------|----------------------|------|--------|-------------------|------|--------|---------------------------------|------|--------|-----------------------------------|------|--------|----------------------------------|------|--------|----------------------------------|------|--------|------|------|
|                                   |              | im0 GT im1                 |      |        | im0 GT im1                     |      |        | im0 GT im1           |      |        | im0 GT im1        |      |        | im0 GT im1                      |      |        | im0 GT im1                        |      |        | im0 GT im1                       |      |        | im0 GT im1                       |      |        |      |      |
|                                   |              | all                        | disc | untext | all                            | disc | untext | all                  | disc | untext | all               | disc | untext | all                             | disc | untext | all                               | disc | untext | all                              | disc | untext | all                              | disc | untext |      |      |
| SoftSplat [170]                   | 2.5          | 2.06                       | 3.06 | 1.14   | 2.80                           | 3.91 | 1.24   | 1.99                 | 2.73 | 1.21   | 3.84              | 4.64 | 2.69   | 8.10                            | 10.0 | 2.96   | 4.10                              | 7.53 | 1.98   | 5.49                             | 12.1 | 1.39   | 5.40                             | 8.33 | 1.50   |      |      |
| PyrWarp [161]                     | 5.4          | 1.99                       | 3.00 | 0.99   | 3.02                           | 4.11 | 1.39   | 1.81                 | 2.54 | 1.13   | 3.95              | 4.73 | 2.77   | 7.51                            | 9.25 | 3.06   | 4.46                              | 8.27 | 2.05   | 5.65                             | 12.5 | 1.51   | 5.84                             | 9.02 | 1.60   |      |      |
| FGME [163]                        | 8.2          | 2.03                       | 3.34 | 0.98   | 3.32                           | 4.43 | 1.63   | 2.48                 | 3.28 | 1.41   | 4.08              | 4.85 | 3.05   | 7.36                            | 9.08 | 3.03   | 4.17                              | 7.62 | 2.06   | 4.95                             | 10.7 | 1.44   | 5.45                             | 8.41 | 1.57   |      |      |
| STAR-Net [169]                    | 10.2         | 2.18                       | 3.37 | 1.21   | 3.46                           | 4.88 | 1.47   | 3.04                 | 3.53 | 1.58   | 4.41              | 5.44 | 2.76   | 7.51                            | 9.27 | 2.98   | 4.65                              | 8.72 | 1.99   | 6.21                             | 13.4 | 1.41   | 6.17                             | 9.45 | 1.49   |      |      |
| DSepConv [167]                    | 16.3         | 2.47                       | 4.39 | 1.28   | 3.32                           | 4.60 | 1.12   | 3.28                 | 3.66 | 1.50   | 5.11              | 6.36 | 3.23   | 7.85                            | 9.69 | 3.11   | 4.68                              | 8.78 | 2.04   | 5.65                             | 12.5 | 1.44   | 6.54                             | 10.2 | 1.58   |      |      |
| MAF-net [168]                     | 20.3         | 2.23                       | 3.84 | 1.08   | 3.53                           | 4.85 | 1.78   | 2.83                 | 3.70 | 1.58   | 4.83              | 5.88 | 3.31   | 9.44                            | 11.8 | 3.27   | 5.27                              | 15   | 10.0   | 2.15                             | 11   | 14.2   | 1.54                             | 6.38 | 10.9   | 1.63 |      |
| MPRN [155]                        | 20.6         | 2.53                       | 4.43 | 1.21   | 3.78                           | 4.97 | 1.57   | 3.39                 | 4.59 | 1.28   | 5.03              | 6.58 | 3.19   | 9.53                            | 14   | 11.9   | 5.25                              | 14   | 9.92   | 2.22                             | 6.87 | 15     | 1.49                             | 6.72 | 16     | 1.60 |      |
| CtxSyn [136]                      | 20.9         | 2.24                       | 3.72 | 1.04   | 2.96                           | 4.16 | 1.35   | 4.32                 | 3.42 | 3.18   | 4.21              | 5.46 | 3.00   | 9.59                            | 16   | 11.9   | 5.22                              | 12   | 9.76   | 2.22                             | 7.02 | 18     | 1.58                             | 6.66 | 15     | 1.69 |      |
| ADC [166]                         | 21.5         | 2.54                       | 4.31 | 1.29   | 3.27                           | 4.46 | 1.62   | 3.76                 | 3.76 | 1.70   | 5.27              | 6.37 | 3.19   | 8.66                            | 12   | 10.8   | 4.78                              | 9    | 9.04   | 2.01                             | 5.72 | 6      | 12.8                             | 1.41 | 6.56   | 13   | 1.51 |
| FRUCNet [157]                     | 22.6         | 2.61                       | 4.34 | 1.52   | 3.30                           | 4.52 | 1.72   | 3.14                 | 3.70 | 1.76   | 4.74              | 5.99 | 3.29   | 8.11                            | 10   | 10.0   | 4.48                              | 8    | 3.56   | 2.02                             | 5.78 | 12     | 1.45                             | 6.06 | 9      | 1.57 |      |
| MS-PFT [164]                      | 23.6         | 2.53                       | 4.43 | 1.16   | 3.61                           | 4.85 | 1.69   | 3.30                 | 4.25 | 1.77   | 5.13              | 6.55 | 3.19   | 7.94                            | 9.81 | 3.21   | 4.49                              | 8.24 | 2.22   | 6.55                             | 12   | 1.39   | 1.79                             | 10   | 1.69   |      |      |
| DAIN [156]                        | 24.4         | 2.38                       | 4.05 | 1.26   | 3.28                           | 4.53 | 1.79   | 3.32                 | 3.77 | 1.20   | 4.65              | 5.88 | 3.41   | 7.88                            | 9.74 | 3.04   | 4.73                              | 10   | 8.90   | 2.04                             | 6.36 | 10     | 14.3                             | 1.51 | 6.25   | 7    | 1.54 |
| CyclicGen [153]                   | 25.0         | 2.26                       | 3.32 | 1.42   | 3.19                           | 4.01 | 2.21   | 2.76                 | 4.05 | 1.62   | 4.97              | 5.92 | 3.79   | 8.00                            | 9.84 | 3.13   | 3.36                              | 6.65 | 2.17   | 4.55                             | 9    | 16.8   | 1.42                             | 4.48 | 1      | 1.52 |      |
| MDP-Flow2 [88]                    | 29.4         | 2.89                       | 5.32 | 1.19   | 3.47                           | 5.07 | 1.26   | 3.66                 | 2.10 | 1.48   | 5.20              | 6.48 | 3.14   | 10.20                           | 12.8 | 3.61   | 6.13                              | 12   | 11.8   | 2.31                             | 7.36 | 23     | 16.8                             | 1.49 | 7.75   | 39   | 1.69 |
| PMMST [114]                       | 29.7         | 2.90                       | 5.43 | 1.20   | 3.50                           | 5.05 | 1.27   | 3.56                 | 5.46 | 1.82   | 5.38              | 7.92 | 3.41   | 10.20                           | 12.8 | 3.60   | 5.76                              | 20   | 11.0   | 2.26                             | 7.39 | 24     | 16.9                             | 1.53 | 7.57   | 24   | 1.72 |
| TOF-M [154]                       | 30.5         | 2.54                       | 4.35 | 1.16   | 3.70                           | 5.19 | 1.88   | 3.43                 | 3.89 | 1.93   | 5.05              | 6.43 | 3.39   | 10.84                           | 17   | 12.3   | 5.34                              | 17   | 10.0   | 2.28                             | 6.88 | 16     | 15.2                             | 1.61 | 7.14   | 19   | 1.69 |
| MEMC-Net+ [165]                   | 30.6         | 2.39                       | 4.20 | 1.28   | 3.36                           | 4.42 | 2.07   | 3.37                 | 3.86 | 1.22   | 4.84              | 5.93 | 3.72   | 8.55                            | 11   | 10.6   | 4.70                              | 9    | 8.81   | 2.03                             | 6.40 | 11     | 14.2                             | 1.58 | 6.37   | 9    | 1.57 |
| SuperSloMo [132]                  | 30.7         | 2.51                       | 4.32 | 1.25   | 3.66                           | 4.86 | 1.93   | 2.91                 | 4.00 | 1.41   | 5.05              | 6.27 | 3.66   | 9.56                            | 15   | 11.9   | 5.37                              | 18   | 10.2   | 2.24                             | 6.69 | 13     | 15.0                             | 1.53 | 6.73   | 17   | 1.66 |
| OFRI [158]                        | 36.0         | 2.28                       | 3.45 | 1.35   | 3.02                           | 4.57 | 1.23   | 3.02                 | 3.34 | 1.79   | 4.51              | 5.42 | 3.88   | 7.98                            | 9.76 | 3.10   | 5.24                              | 13   | 9.92   | 2.10                             | 6.78 | 14     | 14.3                             | 1.82 | 6.32   | 8    | 1.75 |
| SepConv-v1 [127]                  | 38.4         | 2.52                       | 4.83 | 1.11   | 3.56                           | 5.04 | 1.90   | 3.97                 | 4.15 | 1.66   | 5.41              | 6.81 | 3.88   | 10.20                           | 12.8 | 3.37   | 5.47                              | 18   | 10.4   | 2.21                             | 6.88 | 16     | 15.6                             | 1.72 | 6.63   | 14   | 1.62 |
| DeepFlow [86]                     | 39.2         | 2.98                       | 5.67 | 1.23   | 3.88                           | 5.78 | 1.52   | 3.62                 | 5.93 | 1.34   | 5.39              | 7.20 | 3.17   | 11.0                            | 13   | 13.9   | 5.91                              | 28   | 11.3   | 2.29                             | 7.14 | 19     | 16.3                             | 1.49 | 7.80   | 47   | 1.70 |
| CBF [12]                          | 44.3         | 2.83                       | 5.20 | 1.23   | 3.97                           | 5.79 | 1.56   | 3.62                 | 5.79 | 1.57   | 5.21              | 7.12 | 3.29   | 10.1                            | 18   | 12.6   | 5.97                              | 28   | 11.5   | 2.31                             | 7.76 | 58     | 17.8                             | 1.61 | 7.60   | 27   | 1.76 |
| DeepFlow2 [108]                   | 44.8         | 2.99                       | 5.65 | 1.22   | 3.88                           | 5.79 | 1.48   | 3.62                 | 5.93 | 1.34   | 5.38              | 7.44 | 3.27   | 11.0                            | 13   | 13.8   | 5.83                              | 21   | 11.2   | 2.25                             | 7.60 | 39     | 17.4                             | 1.50 | 7.82   | 48   | 1.77 |
| NN-field [71]                     | 46.8         | 2.98                       | 5.70 | 1.20   | 3.31                           | 4.73 | 1.26   | 4.69                 | 5.97 | 1.04   | 5.99              | 9.13 | 3.24   | 10.3                            | 16   | 12.8   | 6.24                              | 53   | 12.0   | 2.31                             | 7.39 | 24     | 16.9                             | 1.54 | 7.69   | 35   | 1.73 |

Table 1: Screenshot of our IE-ranking in the Middlebury benchmark (taken on the 7th of November, currently private).

| Average<br>norm. interpolation<br>error | avg.<br>rank | Mequon<br>(Hidden texture) |      |        | Schefflera<br>(Hidden texture) |      |        | Urban<br>(Synthetic) |      |        | Teddy<br>(Stereo) |      |        | Backyard<br>(High-speed camera) |      |        | Basketball<br>(High-speed camera) |      |        | Dumptruck<br>(High-speed camera) |      |        | Evergreen<br>(High-speed camera) |      |        |
|-----------------------------------------|--------------|----------------------------|------|--------|--------------------------------|------|--------|----------------------|------|--------|-------------------|------|--------|---------------------------------|------|--------|-----------------------------------|------|--------|----------------------------------|------|--------|----------------------------------|------|--------|
|                                         |              | im0 GT im1                 |      |        | im0 GT im1                     |      |        | im0 GT im1           |      |        | im0 GT im1        |      |        | im0 GT im1                      |      |        | im0 GT im1                        |      |        | im0 GT im1                       |      |        | im0 GT im1                       |      |        |
|                                         |              | all                        | disc | untext | all                            | disc | untext | all                  | disc | untext | all               | disc | untext | all                             | disc | untext | all                               | disc | untext | all                              | disc | untext | all                              | disc | untext |
| SoftSplat [170]                         | 2.0          | 0.53                       | 0.51 | 0.61   | 0.52                           | 0.68 | 0.55   | 0.52                 | 0.53 | 0.58   | 0.80              | 0.73 | 1.06   | 0.85                            | 0.81 | 0.98   | 0.81                              | 0.73 | 0.90   | 0.58                             | 0.86 | 0.60   | 0.57                             | 0.73 | 0.59   |
| DAIN [156]                              | 10.8         | 0.58                       | 0.63 | 0.65   | 0.60                           | 0.79 | 1.10   | 0.69                 | 0.73 | 0.68   | 0.86              | 0.86 | 1.10   | 0.87                            | 0.83 | 1.02   | 0.85                              | 0.86 | 0.92   | 0.59                             | 0.97 | 0.61   | 0.66                             | 1.10 | 0.60   |
| STAR-Net [169]                          | 11.1         | 0.56                       | 0.56 | 0.65   | 0.65                           | 0.85 | 0.62   | 0.70                 | 0.69 | 0.76   | 0.87              | 0.82 | 1.06   | 0.83                            | 0.79 | 0.97   | 0.83                              | 0.83 | 0.90   | 0.63                             | 1.09 | 0.61   | 0.61                             | 0.80 | 0.60   |
| FGME [163]                              | 13.4         | 0.46                       | 0.49 | 0.51   | 0.63                           | 0.78 | 0.64   | 0.60                 | 0.65 | 0.67   | 0.85              | 0.76 | 1.15   | 0.82                            | 0.77 | 0.99   | 0.86                              | 0.81 | 0.95   | 0.61                             | 0.93 | 0.70   | 0.63                             | 0.83 | 0.65   |
| PyrWarp [161]                           | 14.7         | 0.47                       | 0.49 | 0.52   | 0.57                           | 0.72 | 0.80   | 0.51                 | 0.58 | 0.62   | 0.82              | 0.75 | 1.10   | 0.84                            | 0.79 | 1.00   | 0.85                              | 0.75 | 0.94   | 0.64                             | 0.93 | 0.81   | 0.62                             | 0.80 | 0.67   |
| DSepConv [167]                          | 16.0         | 0.58                       | 0.72 | 0.62   | 0.63                           | 0.82 | 0.65   | 0.72                 | 0.70 | 0.75   | 0.96              | 0.91 | 1.15   | 0.87                            | 0.83 | 1.04   | 0.89                              | 1.00 | 0.93   | 0.57                             | 0.89 | 0.64   | 0.65                             | 0.87 | 0.64   |
| MEMC-Net+ [165]                         | 17.2         | 0.59                       | 0.65 | 0.65   | 0.64                           | 0.75 | 0.70   | 0.80                 | 0.77 | 0.96   | 0.88              | 0.83 | 1.12   | 0.88                            | 0.85 | 1.01   | 0.85                              | 0.88 | 0.91   | 0.64                             | 1.13 | 0.62   | 0.63                             | 0.86 | 0.60   |
| MPRN [155]                              | 17.5         | 0.59                       | 0.70 | 0.64   | 0.66                           | 0.89 | 0.64   | 0.77                 | 1.07 | 0.64   | 0.93              | 0.93 | 1.17   | 0.95                            | 0.91 | 1.12   | 0.96                              | 1.04 | 1.01   | 0.60                             | 0.98 | 0.65   | 0.72                             | 1.02 | 0.67   |
| ADC [166]                               | 20.1         | 0.61                       | 0.68 | 0.67   | 0.62                           | 0.78 | 0.66   | 0.84                 | 0.81 | 1.02   | 0.96              | 0.93 | 1.15   | 0.90                            | 0.86 | 1.05   | 0.92                              | 1.12 | 0.91   | 0.57                             | 0.92 | 0.61   | 0.64                             | 0.88 | 0.60   |
| MAF-net [168]                           | 26.2         | 0.48                       | 0.61 | 0.52   | 0.65                           | 0.73 | 0.62   | 0.67                 | 0.86 | 0.78   | 0.93              | 0.91 | 1.20   | 0.93                            | 0.89 | 1.06   | 0.95                              | 1.08 | 0.99   | 0.67                             | 1.04 | 0.83   | 0.65                             | 0.86 | 0.69   |
| FRUCNet [157]                           | 28.5         | 0.70                       | 0.71 | 0.80   | 0.64                           | 0.80 | 0.69   | 0.78                 | 0.75 | 0.95   | 0.91              | 0.91 | 1.15   | 0.86                            | 0.83 | 1.01   | 0.86                              | 0.89 | 0.92   | 0.58                             | 0.89 | 0.64   | 0.63                             | 0.83 | 0.64   |
| CyclicGen [153]                         | 28.8         | 0.64                       | 0.69 | 0.73   | 0.67                           | 0.74 | 0.88   | 0.72                 | 0.84 | 1.22   | 0.95              | 0.89 | 1.24   | 0.91                            | 0.85 | 1.09   | 0.87                              | 0.67 | 1.10   | 0.53                             | 0.71 | 0.62   | 0.52                             | 0.64 | 0.61   |
| CtxSyn [136]                            | 29.2         | 0.50                       | 0.57 | 0.55   | 0.55                           | 0.71 | 0.59   | 1.42                 | 0.64 | 2.08   | 0.87              | 0.82 | 1.18   | 0.95                            | 0.90 | 1.13   | 0.94                              | 1.02 | 1.02   | 0.68                             | 1.00 | 0.83   | 0.67                             | 0.89 | 0.68   |
| PMMST [114]                             | 32.5         | 0.59                       | 0.73 | 0.64   | 0.64                           | 0.85 | 0.59   | 0.99                 | 0.89 | 1.05   | 0.97              | 1.14 | 1.23   | 0.99                            | 0.92 | 1.14   | 1.03                              | 1.29 | 1.04   | 0.71                             | 1.33 | 0.42   | 0.77                             | 1.21 | 0.64   |
| SuperSloMo [132]                        | 33.5         | 0.59                       | 0.69 | 0.64   | 0.72                           | 0.91 | 0.75   | 0.74                 | 1.01 | 1.16   | 0.98              | 0.95 | 1.23   | 0.94                            | 0.90 | 1.12   | 0.96                              | 1.08 | 1.04   | 0.60                             | 0.90 | 0.71   | 0.69                             | 1.14 | 0.68   |
| MS-PFT [164]                            | 34.7         | 0.56                       | 0.67 | 0.61   | 0.69                           | 0.90 | 0.70   | 0.82                 | 1.04 | 0.89   | 0.96              | 1.04 | 1.18   | 0.91                            | 0.88 | 1.10   | 0.95                              | 1.00 | 1.02   | 0.72                             | 1.05 | 0.92   | 0.72                             | 1.05 | 0.70   |
| NN-field [71]                           | 36.7         | 0.59                       | 0.73 | 0.64   | 0.59                           | 0.77 | 0.58   | 1.09                 | 0.99 | 1.17   | 1.00              | 1.18 | 1.26   | 0.98                            | 0.95 | 1.14   | 1.08                              | 1.46 | 1.05   | 0.68                             | 1.26 | 0.31   | 0.78                             | 1.24 | 0.63   |
| OFRI [158]                              | 37.7         | 0.60                       | 0.57 | 0.69   | 0.67                           | 0.81 | 0.79   | 0.70                 | 0.59 | 0.83   | 0.87              | 0.81 | 1.15   | 0.86                            | 0.81 | 1.03   | 0.92                              | 0.99 | 1.08   | 0.79                             | 0.90 | 1.18   | 0.67                             | 0.84 | 0.78   |
| MDP-Flow2 [168]                         | 37.8         | 0.59                       | 0.72 | 0.63   | 0.62                           | 0.85 | 0.58   | 1.24                 | 0.91 | 2.52   | 0.94              | 1.05 | 1.24   | 0.98                            | 0.96 | 1.16   | 1.09                              | 1.49 | 1.05   | 0.70                             | 1.33 | 0.40   | 0.68                             | 1.24 | 0.63   |

|                                  | Boxing    |              | Crosswalk    |              | Driving   |           | Market-1  |           | Market-2     |              | RitualDance  |              | Square       |              | Tango     |              |
|----------------------------------|-----------|--------------|--------------|--------------|-----------|-----------|-----------|-----------|--------------|--------------|--------------|--------------|--------------|--------------|-----------|--------------|
|                                  | 2K        | "4K"         | 2K           | "4K"         | 2K        | "4K"      | 2K        | "4K"      | 2K           | "4K"         | 2K           | "4K"         | 2K           | "4K"         | 2K        | "4K"         |
|                                  | PSNR<br>↑ | PSNR<br>↑    | PSNR<br>↑    | PSNR<br>↑    | PSNR<br>↑ | PSNR<br>↑ | PSNR<br>↑ | PSNR<br>↑ | PSNR<br>↑    | PSNR<br>↑    | PSNR<br>↑    | PSNR<br>↑    | PSNR<br>↑    | PSNR<br>↑    | PSNR<br>↑ | PSNR<br>↑    |
| SepConv - $\mathcal{L}_1$ [6]    | 36.75     | 33.35        | 36.34        | 32.79        | 34.95     | 33.32     | 32.03     | 31.21     | 36.49        | 34.62        | 28.15        | 23.12        | 38.63        | 36.16        | 34.85     | 31.90        |
| SepConv - $\mathcal{L}_F$ [6]    | 36.54     | 33.15        | 35.69        | 32.10        | 34.84     | 33.24     | 31.69     | 30.68     | 36.26        | 34.27        | 27.95        | 23.06        | 38.41        | 35.84        | 34.43     | 31.08        |
| ToFlow [8]                       | 36.75     | 33.52        | 33.54        | 31.42        | 34.84     | 33.38     | 30.87     | 29.41     | 34.24        | 30.30        | 28.11        | 22.61        | 38.87        | 36.59        | 34.24     | 28.67        |
| CyclicGen [4]                    | 36.51     | 32.95        | 33.73        | 31.37        | 34.74     | 33.46     | 30.02     | 28.69     | 29.89        | 27.91        | 28.21        | 22.95        | 37.44        | 35.13        | 33.45     | 29.60        |
| CtxSyn - $\mathcal{L}_{Lap}$ [5] | 37.41     | 33.55        | 38.14        | 34.03        | 34.92     | 32.71     | 32.93     | 31.97     | 38.33        | 37.18        | 28.47        | 23.08        | 39.35        | 37.09        | 36.16     | 34.21        |
| CtxSyn - $\mathcal{L}_F$ [5]     | 36.68     | 32.88        | 37.40        | 33.01        | 34.56     | 32.45     | 32.20     | 31.10     | 37.94        | 36.62        | 28.24        | 23.10        | 38.87        | 36.61        | 35.36     | 33.10        |
| DAIN [2]                         | 37.74     | 34.75        | <u>38.81</u> | <u>35.90</u> | 35.14     | 33.60     | 33.06     | 31.99     | 38.03        | 36.49        | 29.16        | <u>23.91</u> | 39.50        | 37.00        | 36.14     | <u>34.28</u> |
| Ours - $\mathcal{L}_{Lap}$       | 38.48     | <u>35.40</u> | 38.71        | 33.69        | 35.68     | 33.82     | 33.34     | 32.16     | <u>39.61</u> | <u>37.86</u> | <u>29.20</u> | <u>23.67</u> | <u>41.23</u> | <u>38.00</u> | 36.73     | 34.16        |
| Ours - $\mathcal{L}_F$           | 37.45     | 34.08        | 37.15        | 32.36        | 35.15     | 33.15     | 32.16     | 30.95     | 39.06        | 36.64        | 28.72        | 23.29        | 40.65        | 37.04        | 35.57     | 32.51        |

Table 4: Quantitative comparison in terms of PSNR on the eight 4K clips from Xiph with the most inter-frame motion.

|                                  | Boxing       |              | Crosswalk    |              | Driving      |              | Market-1     |              | Market-2     |              | RitualDance  |              | Square       |              | Tango        |              |
|----------------------------------|--------------|--------------|--------------|--------------|--------------|--------------|--------------|--------------|--------------|--------------|--------------|--------------|--------------|--------------|--------------|--------------|
|                                  | 2K           | "4K"         |
|                                  | SSIM<br>↑    |
| SepConv - $\mathcal{L}_1$ [6]    | 0.946        | 0.903        | 0.937        | 0.890        | 0.939        | 0.916        | 0.823        | 0.752        | 0.963        | 0.925        | 0.926        | 0.858        | 0.978        | 0.952        | 0.919        | 0.844        |
| SepConv - $\mathcal{L}_F$ [6]    | 0.940        | 0.886        | 0.926        | 0.871        | 0.936        | 0.912        | 0.805        | 0.718        | 0.960        | 0.914        | 0.917        | 0.846        | 0.976        | 0.947        | 0.906        | 0.812        |
| ToFlow [8]                       | 0.947        | 0.900        | 0.925        | 0.874        | 0.935        | 0.917        | 0.805        | 0.703        | 0.947        | 0.834        | 0.928        | 0.852        | 0.978        | 0.953        | 0.915        | 0.816        |
| CyclicGen [4]                    | 0.946        | 0.894        | 0.924        | 0.867        | 0.930        | 0.916        | 0.764        | 0.658        | 0.847        | 0.749        | 0.923        | 0.850        | 0.972        | 0.938        | 0.904        | 0.815        |
| CtxSyn - $\mathcal{L}_{Lap}$ [5] | 0.952        | 0.908        | 0.944        | 0.898        | 0.940        | 0.917        | 0.841        | 0.771        | 0.972        | 0.944        | 0.932        | 0.866        | 0.980        | 0.956        | 0.928        | 0.863        |
| CtxSyn - $\mathcal{L}_F$ [5]     | 0.934        | 0.862        | 0.926        | 0.858        | 0.934        | 0.905        | 0.804        | 0.715        | 0.968        | 0.931        | 0.919        | 0.842        | 0.977        | 0.947        | 0.904        | 0.796        |
| DAIN [2]                         | 0.956        | 0.915        | 0.948        | <u>0.905</u> | 0.942        | 0.921        | 0.846        | 0.770        | 0.972        | 0.945        | 0.939        | 0.879        | 0.981        | 0.958        | 0.932        | 0.866        |
| Ours - $\mathcal{L}_{Lap}$       | <u>0.958</u> | <u>0.922</u> | <u>0.951</u> | <u>0.905</u> | <u>0.947</u> | <u>0.924</u> | <u>0.853</u> | <u>0.782</u> | <u>0.975</u> | <u>0.949</u> | <u>0.944</u> | <u>0.888</u> | <u>0.984</u> | <u>0.962</u> | <u>0.936</u> | <u>0.872</u> |
| Ours - $\mathcal{L}_F$           | 0.936        | 0.874        | 0.921        | 0.850        | 0.936        | 0.907        | 0.797        | 0.706        | 0.970        | 0.925        | 0.923        | 0.848        | 0.980        | 0.946        | 0.902        | 0.793        |

Table 5: Quantitative comparison in terms of SSIM on the eight 4K clips from Xiph with the most inter-frame motion.

|                                  | Boxing       |              | Crosswalk    |              | Driving      |              | Market-1     |              | Market-2     |              | RitualDance  |              | Square       |              | Tango        |              |
|----------------------------------|--------------|--------------|--------------|--------------|--------------|--------------|--------------|--------------|--------------|--------------|--------------|--------------|--------------|--------------|--------------|--------------|
|                                  | 2K           | "4K"         |
|                                  | LPIPS<br>↓   |
| SepConv - $\mathcal{L}_1$ [6]    | 0.037        | 0.133        | 0.094        | 0.208        | 0.038        | 0.061        | 0.156        | 0.331        | 0.026        | 0.106        | 0.100        | 0.239        | 0.012        | 0.040        | 0.071        | 0.234        |
| SepConv - $\mathcal{L}_F$ [6]    | 0.021        | 0.057        | 0.046        | 0.111        | 0.037        | 0.055        | 0.096        | 0.187        | 0.017        | 0.062        | 0.063        | 0.171        | 0.010        | 0.027        | 0.037        | 0.109        |
| ToFlow [8]                       | 0.035        | 0.088        | 0.088        | 0.152        | 0.047        | 0.062        | 0.139        | 0.238        | 0.027        | 0.118        | 0.075        | 0.189        | 0.013        | 0.038        | 0.063        | 0.171        |
| CyclicGen [4]                    | 0.039        | 0.090        | 0.085        | 0.142        | 0.068        | 0.067        | 0.185        | 0.271        | 0.108        | 0.169        | 0.077        | 0.177        | 0.029        | 0.060        | 0.073        | 0.159        |
| CtxSyn - $\mathcal{L}_{Lap}$ [5] | 0.053        | 0.172        | 0.103        | 0.215        | 0.040        | 0.074        | 0.185        | 0.354        | 0.017        | 0.073        | 0.086        | 0.223        | 0.012        | 0.045        | 0.085        | 0.244        |
| CtxSyn - $\mathcal{L}_F$ [5]     | 0.021        | 0.056        | 0.031        | 0.082        | 0.038        | 0.058        | 0.078        | 0.154        | 0.013        | 0.036        | 0.061        | 0.174        | 0.009        | 0.022        | 0.031        | 0.066        |
| DAIN [2]                         | 0.063        | 0.161        | 0.139        | 0.214        | 0.045        | 0.073        | 0.200        | 0.329        | 0.020        | 0.088        | 0.091        | 0.200        | 0.013        | 0.051        | 0.105        | 0.243        |
| Ours - $\mathcal{L}_{Lap}$       | 0.078        | 0.226        | 0.177        | 0.322        | 0.053        | 0.095        | 0.273        | 0.455        | 0.022        | 0.118        | 0.105        | 0.238        | 0.013        | 0.067        | 0.131        | 0.349        |
| Ours - $\mathcal{L}_F$           | <u>0.016</u> | <u>0.043</u> | <u>0.026</u> | <u>0.079</u> | <u>0.033</u> | <u>0.053</u> | <u>0.074</u> | <u>0.148</u> | <u>0.010</u> | <u>0.034</u> | <u>0.045</u> | <u>0.136</u> | <u>0.006</u> | <u>0.018</u> | <u>0.024</u> | <u>0.059</u> |

Table 6: Quantitative comparison in terms of LPIPS on the eight 4K clips from Xiph with the most inter-frame motion.



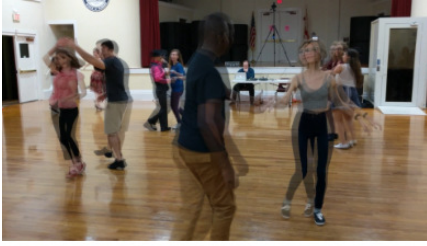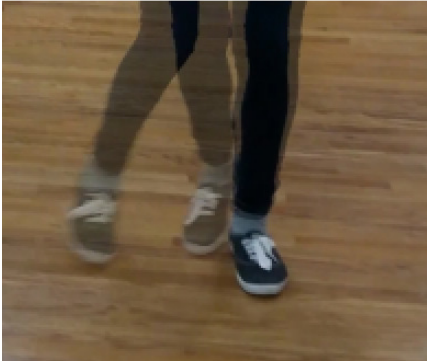

Overlayed Input

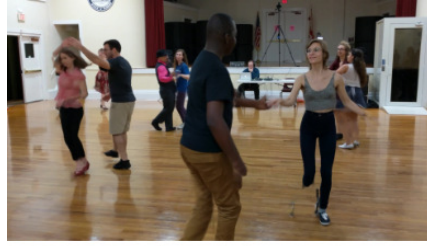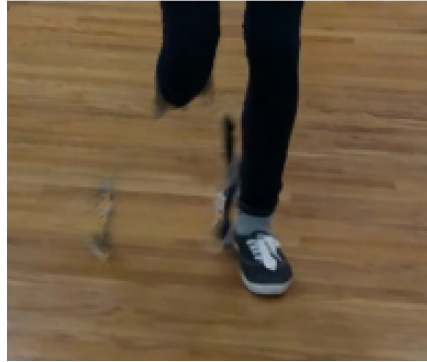

ToFlow [8]

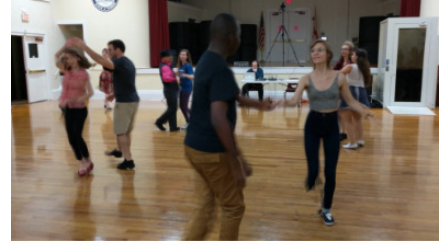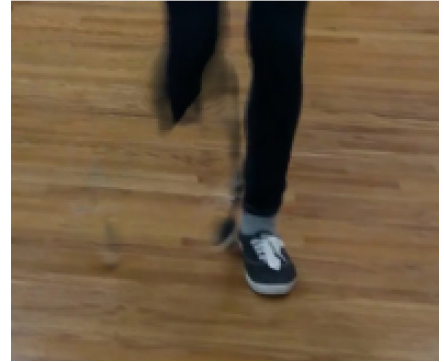

CyclicGen [4]

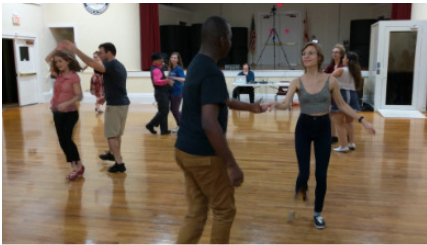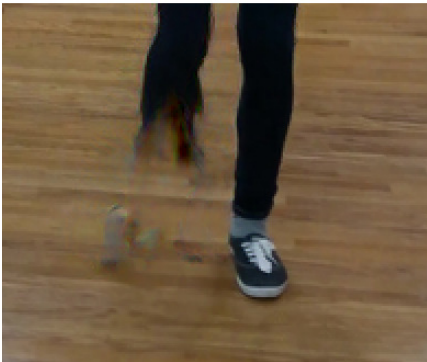

CtxSyn -  $\mathcal{L}_F$  [5]

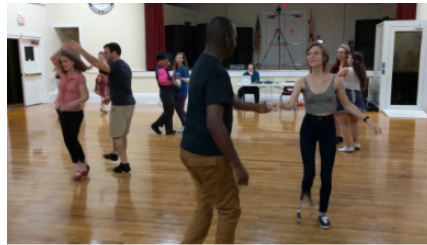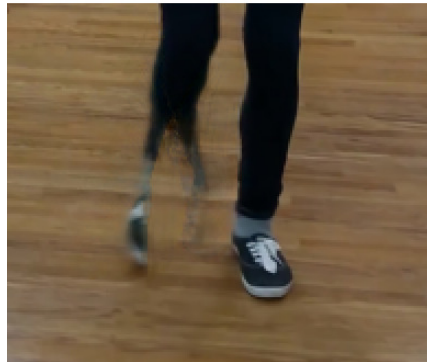

DAIN [2]

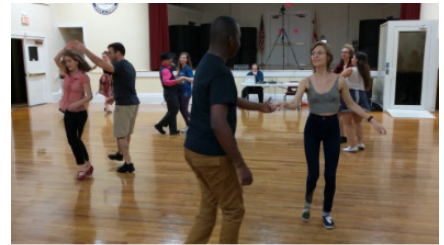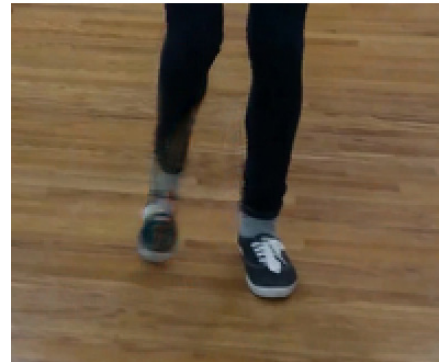

Ours -  $\mathcal{L}_F$

Figure 1: Qualitative comparison, please also consider our supplementary video demo to see this example in motion.

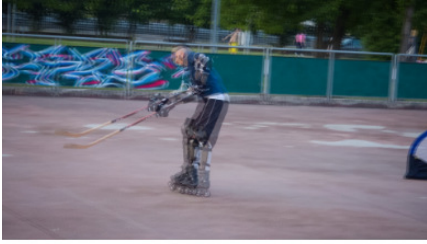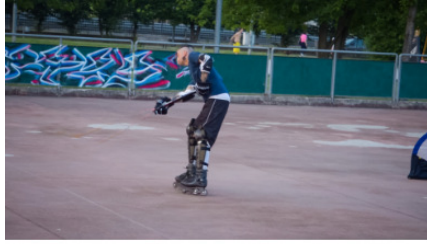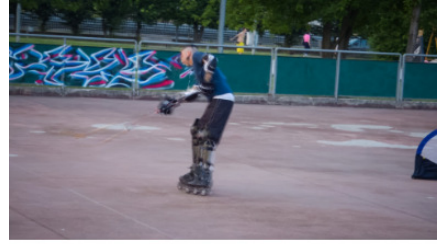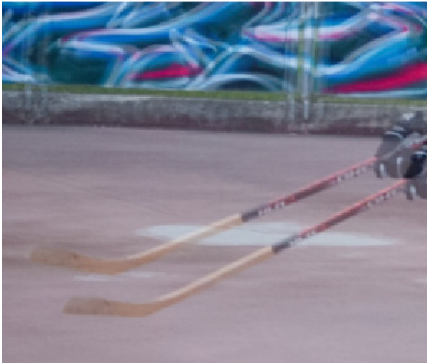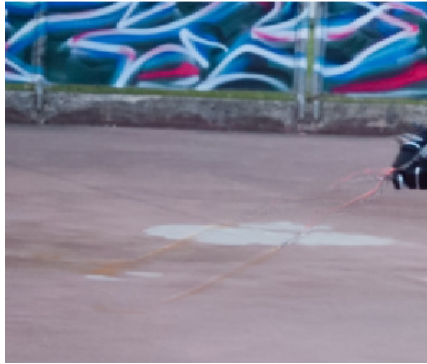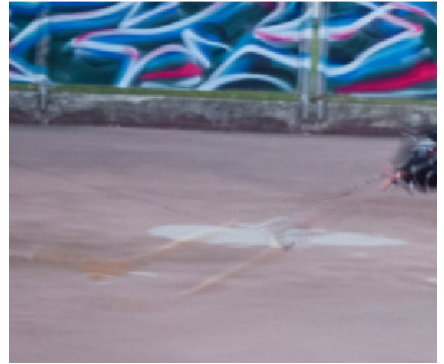

Overlayed Input

ToFlow [8]

CyclicGen [4]

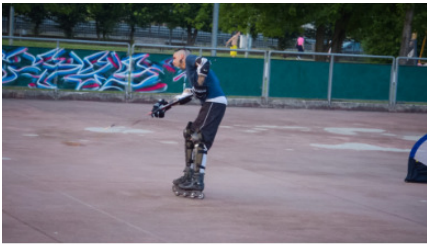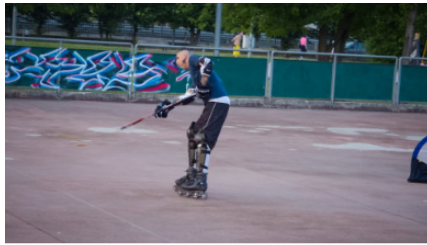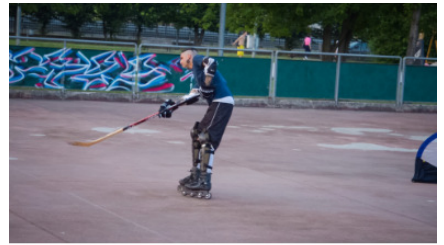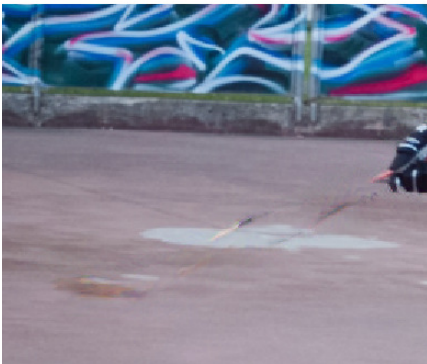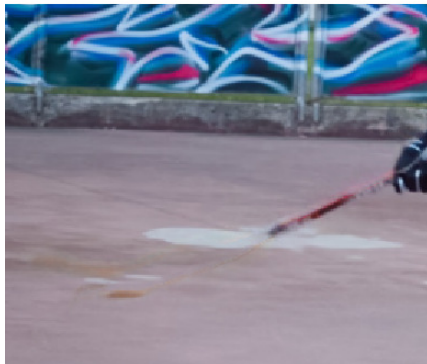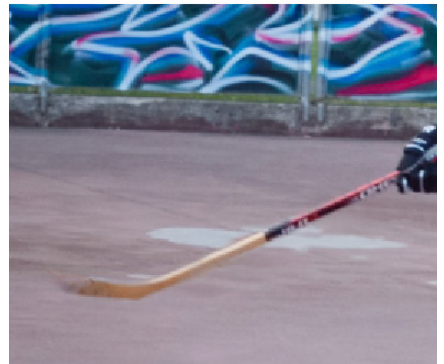

CtxSyn -  $\mathcal{L}_F$  [5]

DAIN [2]

Ours -  $\mathcal{L}_F$

Figure 2: Qualitative comparison, please also consider our supplementary video demo to see this example in motion.



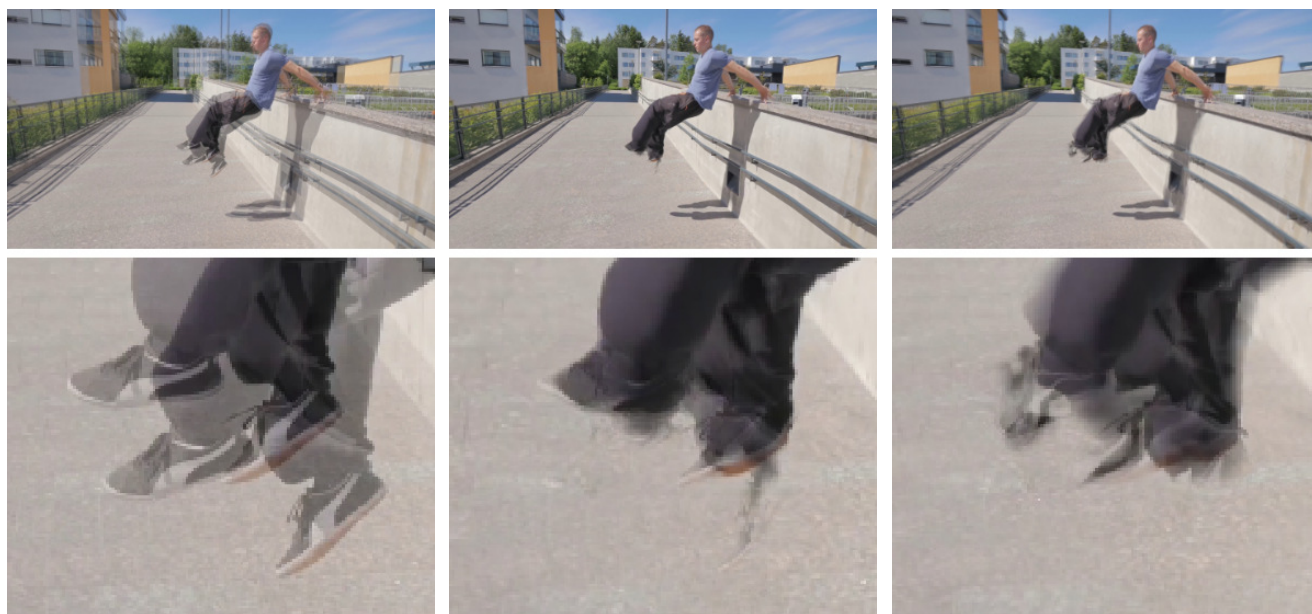

Overlaid Input

ToFlow [8]

CyclicGen [4]

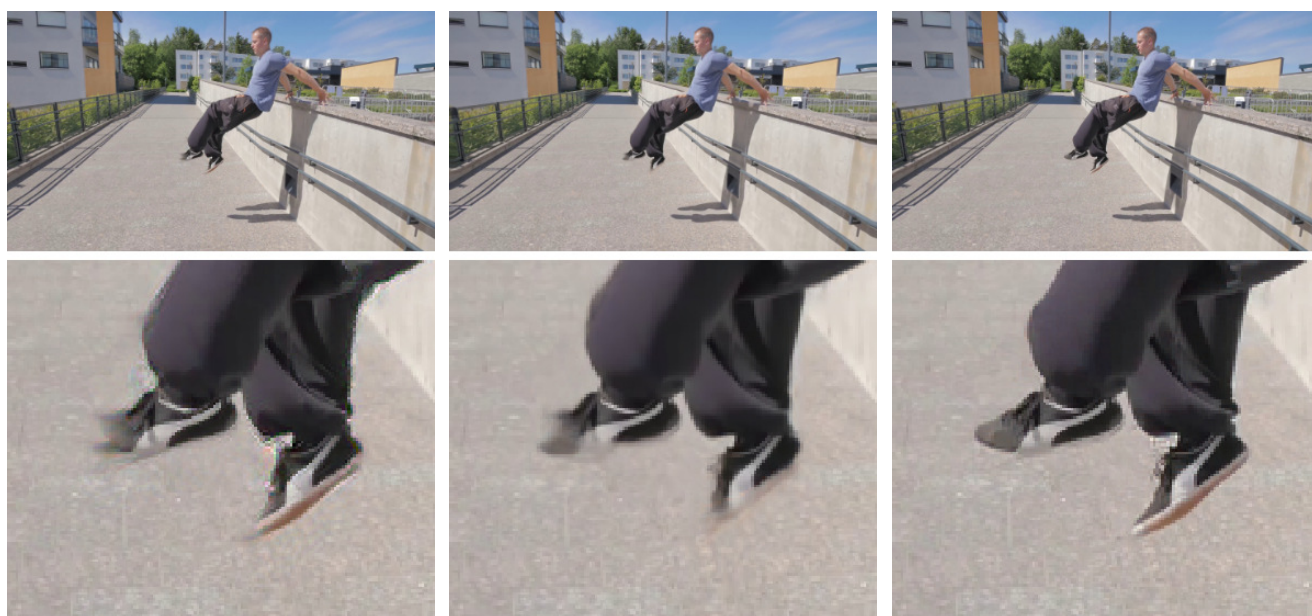

CtxSyn -  $\mathcal{L}_F$  [5]

DAIN [2]

Ours -  $\mathcal{L}_F$

Figure 3: Qualitative comparison, please also consider our supplementary video demo to see this example in motion.

## References

- [1] Simon Baker, Daniel Scharstein, J. P. Lewis, Stefan Roth, Michael J. Black, and Richard Szeliski. A Database and Evaluation Methodology for Optical Flow. *International Journal of Computer Vision*, 92(1):1–31, 2011. [1](#)
- [2] Wenbo Bao, Wei-Sheng Lai, Chao Ma, Xiaoyun Zhang, Zhiyong Gao, and Ming-Hsuan Yang. Depth-Aware Video Frame Interpolation. In *IEEE Conference on Computer Vision and Pattern Recognition*, 2019. [1](#), [2](#), [3](#), [4](#), [5](#), [6](#)
- [3] Huaizu Jiang, Deqing Sun, Varun Jampani, Ming-Hsuan Yang, Erik G. Learned-Miller, and Jan Kautz. Super SloMo: High Quality Estimation of Multiple Intermediate Frames for Video Interpolation. In *IEEE Conference on Computer Vision and Pattern Recognition*, 2018. [2](#)
- [4] Yu-Lun Liu, Yi-Tung Liao, Yen-Yu Lin, and Yung-Yu Chuang. Deep Video Frame Interpolation Using Cyclic Frame Generation. In *AAAI Conference on Artificial Intelligence*, 2019. [2](#), [3](#), [4](#), [5](#), [6](#)
- [5] Simon Niklaus and Feng Liu. Context-Aware Synthesis for Video Frame Interpolation. In *IEEE Conference on Computer Vision and Pattern Recognition*, 2018. [2](#), [3](#), [4](#), [5](#), [6](#)
- [6] Simon Niklaus, Long Mai, and Feng Liu. Video Frame Interpolation via Adaptive Separable Convolution. In *IEEE International Conference on Computer Vision*, 2017. [2](#), [3](#)
- [7] Federico Perazzi, Jordi Pont-Tuset, Brian McWilliams, Luc Van Gool, Markus H. Gross, and Alexander Sorkine-Hornung. A Benchmark Dataset and Evaluation Methodology for Video Object Segmentation. In *IEEE Conference on Computer Vision and Pattern Recognition*, 2016. [1](#)
- [8] Tianfan Xue, Baian Chen, Jiajun Wu, Donglai Wei, and William T. Freeman. Video Enhancement With Task-Oriented Flow. *International Journal of Computer Vision*, 127(8):1106–1125, 2019. [2](#), [3](#), [4](#), [5](#), [6](#)
